# Supplementary material for: The impact of the chalcogen-substitution element and initial spectroscopic state on excited-state relaxation pathways in nucleobase photosensitizers: a combination of static and dynamic studies
Source: Royal Society of Chemistry journal article supplement (doi:10.1039/d3cp03730d), 2023-01-01
Supplement: d3cp03730d1.pdf [file d3cp03730d1.pdf]

### Supporting Information for

The impact of chalcogen-substitution element and initial spectroscopic state on excited-state relaxation pathways in nucleobase photosensitizers: a combination of static and dynamic studies

Min Xie,<sup>a</sup> Shuang-xiao Ren,<sup>a</sup> Die Hu,<sup>a</sup> Ji-meng Zhong,<sup>a</sup> Jie Luo,<sup>a</sup> Yin Tan,<sup>a</sup> Yan-ping Li,<sup>b</sup> Li-ping Si,<sup>a</sup> Jun Cao,<sup>\*,a,c</sup>

<sup>a</sup>*School of Materials Science and Hydrogen Energy & Guangdong Key Laboratory for Hydrogen Energy Technologies, Foshan University, Foshan, Guangdong, 528000, P. R. China*

<sup>b</sup>*School of Medicine, Foshan University, Foshan, Guangdong, 528000, P. R. China*

<sup>c</sup>*Guizhou Provincial Key Laboratory of Computational Nano-Material Science, Guizhou Education University, Guiyang, Guizhou, 550018, P. R. China*

#### Contents:

1. **Table S1.** Relative energies (eV) of different states at the MS-CASPT2(12,10)/ ANO-RCC-VDZP optimized minima and crossing points.
2. **Table S2.** Spin-orbit couplings between  $S_2$  and  $T_2$  at the  $S_2/S_1$  points and between  $S_1$  and  $T_2$  at the  $S_1$  minima of both molecules.
3. **Figure S1.** Molecular orbitals included in the active space for each molecule.
4. **Figure S2.** The MS-CASPT2(12,10)/ANO-RCC-VDZP optimized minimum and crossing structures.
5. **Figure S3.** LIICs computed at the LR-TD- $\omega$ B97XD/6-31G\* level of theory based on the MS-CASPT2(12,10)/ANO-RCC-VDZP optimized critical points.
6. **Figure S4.** Time evolution of some chosen geometrical parameters from dynamics of the  $S_2$  state of 6TG.
7. **Figure S5.** Time evolution of some chosen geometrical parameters from dynamics of the  $S_2$  state of 6SG.
8. **Figure S6.** Additional calculations of the energy gaps and spin-orbit coupling magnitudes at the  $S_2/S_1$ ,  $S_2/T_2$ , and  $S_2/T_3$  crossing points of 6SG, and the energy gaps and spin-orbit coupling magnitudes between  $S_2$  and  $T_2$  and between  $S_2$  and  $T_3$  at the  $S_2/S_1$  hopping points of 6TG.
9. **Figure S7.** Distribution of crossing time, spin-orbit coupling vs energy gap, and geometrical parameters for the  $S_1 \rightarrow$  triplet crossings from dynamics of the  $S_2$  state of 6SG.
10. **Figure S8.** Time evolution of some chosen geometrical parameters from dynamics of the  $S_3$  state of 6TG.
11. **Figure S9.** Geometrical parameters of hopping points involved in the  $S_3 \rightarrow S_2 \rightarrow S_1$  internal conversion for 6TG.
12. **Figure S10.** Time evolution of some chosen geometrical parameters from dynamics of the  $S_3$  state of 6SG.
13. **Figure S11.** Geometrical parameters of hopping points involved in the  $S_3 \rightarrow S_2 \rightarrow S_1$  internal conversion for 6SG.
14. **Figure S12.** Spin-orbit coupling vs energy gap for those between  $S_2$  and  $T_2$  and between  $S_2$  and  $T_3$  at the  $S_2 \rightarrow S_1$  and  $S_2 \rightarrow T_{2,3}$  crossing points from dynamics of the  $S_3$  state of both molecules.
15. **Figure S13.** Distribution of crossing time, spin-orbit coupling vs energy gap, and geometrical parameters for the  $S_1 \rightarrow$  triplet crossings from dynamics of the  $S_3$  state of both molecules.

**Table S1.** Relative energies (eV) of different states at the optimized minima and crossing points in different level of theory. The LR-TD- $\omega$ B97XD/6-31G\* calculated energies are based on MS-CASPT2 optimized geometries and given in italic. The oscillator strengths are given in parentheses.

| Energy<br>Geometry                                     |                                                | 6TG                                                         |                                                                                 | 6SG                                                         |                                                                                  |
|--------------------------------------------------------|------------------------------------------------|-------------------------------------------------------------|---------------------------------------------------------------------------------|-------------------------------------------------------------|----------------------------------------------------------------------------------|
|                                                        |                                                | Based on MS-CASPT2(12,10)/ ANO-RCC-VDZP ptimized structures | MS-CASPT2//CASSCF (14,12)/ANO-L optimized structures (from Ref.45 in main text) | Based on MS-CASPT2(12,10)/ANO-RCC-VDZP optimized structures | MS-CASPT2//CASSCF(12,10)/cc-pVDZ optimized structures (from Ref.51 in main text) |
| S <sub>0</sub><br>minimum                              | S <sub>0</sub>                                 | 0.0<br><i>0.0</i>                                           | 0.0                                                                             | 0.0<br><i>0.0</i>                                           | 0.0                                                                              |
|                                                        | S <sub>1</sub>                                 | 3.41 3.38                                                   | 3.36                                                                            | 2.93 2.94                                                   | 2.61                                                                             |
|                                                        | S <sub>2</sub>                                 | 4.0(0.50) <i>4.33</i>                                       | 4.05(0.54)                                                                      | 3.59(0.52) <i>4.0</i>                                       | 3.39(0.24)                                                                       |
|                                                        | S <sub>3</sub>                                 | 4.85 (0.11)<br><i>4.98</i>                                  | 4.90(0.144)                                                                     | 4.53 (0.05)<br><i>4.75</i>                                  |                                                                                  |
|                                                        | T <sub>1</sub>                                 | 3.03 2.63                                                   | 3.10                                                                            | 2.68 2.21                                                   | 2.40                                                                             |
|                                                        | T <sub>2</sub>                                 | 3.37 3.08                                                   | 3.31                                                                            | 2.92 2.65                                                   | 2.56                                                                             |
|                                                        | T <sub>3</sub>                                 | 4.20 3.79                                                   | 4.24                                                                            | 4.07 3.75                                                   |                                                                                  |
| S <sub>1</sub><br>minimum                              | S <sub>1</sub> /T <sub>2</sub> /T <sub>1</sub> | 3.13/3.09/2.89<br><i>3.23/2.89/2.49</i>                     | 3.18                                                                            | 2.69/2.66/2.50<br><i>2.93/2.59/2.09</i>                     | 2.46                                                                             |
| S <sub>2</sub><br>minimum                              | S <sub>2</sub>                                 | 3.71<br><i>4.23</i>                                         | 3.78                                                                            | 3.26<br><i>3.89</i>                                         | 3.04                                                                             |
| T <sub>1</sub><br>minimum                              | T <sub>1</sub>                                 | 2.76<br><i>2.44</i>                                         | 3.00                                                                            | 2.44<br><i>2.03</i>                                         | 2.24                                                                             |
| S <sub>2</sub> /S <sub>1</sub>                         | S <sub>2</sub> /S <sub>1</sub> /T <sub>2</sub> | 4.04/4.04/4.02<br><i>4.42/4.15/3.93</i>                     | 3.96                                                                            | 3.68/3.66/3.68<br><i>4.28/3.94/3.74</i>                     |                                                                                  |
| T <sub>1</sub> /S <sub>0</sub>                         | T <sub>1</sub> /S <sub>0</sub>                 | 3.06/3.06<br><i>3.07/3.48</i>                               | 3.16                                                                            | 2.73/2.73<br><i>2.70/3.23</i>                               | 2.35/2.22                                                                        |
| S <sub>1</sub> ( $\pi_{45}\pi_{23}^*$ )/S <sub>0</sub> | S <sub>1</sub> /S <sub>0</sub>                 | 4.73/4.71<br><i>5.44/5.07</i>                               | 3.90                                                                            | 4.28/4.27<br><i>5.03/4.69</i>                               |                                                                                  |
| S <sub>1</sub> ( $n_{10}\pi_{610}^*$ )/S <sub>0</sub>  | S <sub>1</sub> /S <sub>0</sub>                 | 4.05/4.03                                                   | 4.87                                                                            | 3.69/3.68                                                   |                                                                                  |

**Table S2.** Spin-orbit coupling (SOC) magnitudes (cm<sup>-1</sup>) between S<sub>2</sub> and T<sub>2</sub> at the S<sub>2</sub>/S<sub>1</sub> points and between S<sub>1</sub> and T<sub>2</sub> at the S<sub>1</sub> minima of both molecules, calculated in different level of theory.

| SOCs<br>Region                 |  | 6TG       |          | 6SG       |          |
|--------------------------------|--|-----------|----------|-----------|----------|
|                                |  | MS-CASPT2 | LR-TDDFT | MS-CASPT2 | LR-TDDFT |
| S <sub>2</sub> /S <sub>1</sub> |  | 78.5      | 63.0     | 387.1     | 412.0    |
| S <sub>1</sub> minimum         |  | 88.6      | 85.1     | 427.3     | 401.3    |

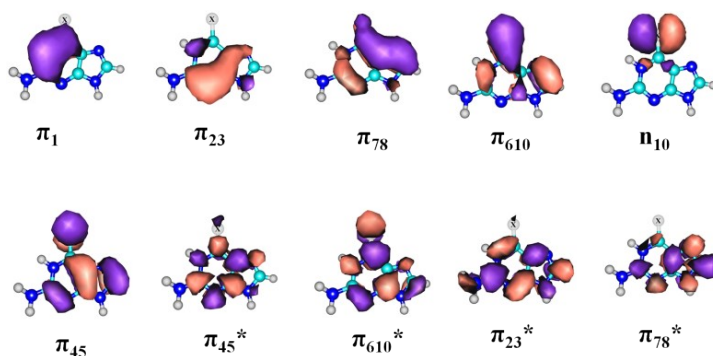

**Figure S1.** Molecular orbitals included in the active space. X=S or Se.

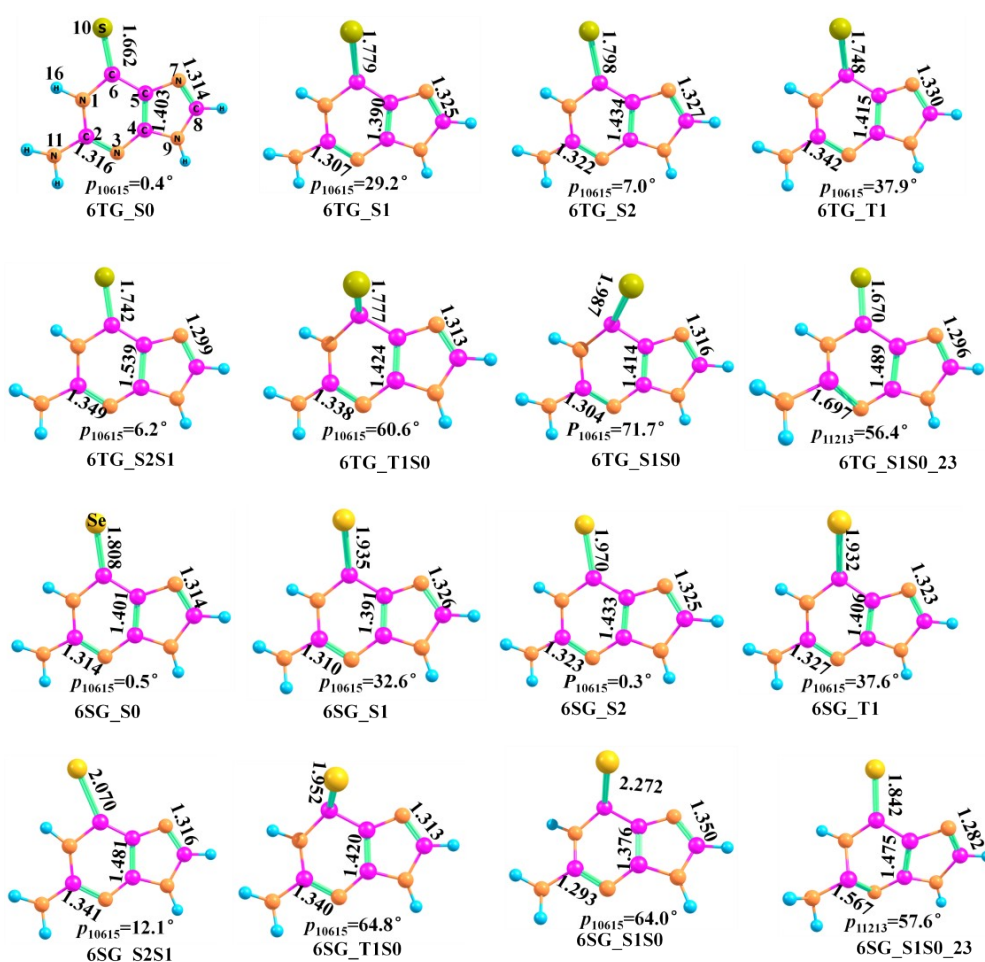

**Figure S2.** The MS-CASPT2(12,10)/ANO-RCC-VDZP optimized minimum and crossing structures, along with chosen geometrical parameters (bond-length in Å, and angle in °). The atom labels are given in the  $S_0$  minimum of 6TG (6TG\_S0). Minima in the  $S_1(n_s\pi^*)$ ,  $S_2(\pi\pi^*)$ ,  $T_1(\pi\pi^*)$  states of 6TG are referred as 6TG\_S1, 6TG\_S2, and 6TG\_T1, respectively, and crossing points between  $S_2(\pi\pi^*)$  and  $S_1(n_s\pi^*)$ , between  $T_1(\pi\pi^*)$  and  $S_0$ , between  $S_1(n_s\pi^*)$  and  $S_0$ , and between  $S_1(\pi\pi_{23}^*)$  and  $S_0$  are referred as 6TG\_S2S1, 6TG\_T1S0, 6TG\_S1S0, and 6TG\_S1S0\_23, respectively. For 6SG, minima in the  $S_0$ ,  $S_1(n_s\pi^*)$ ,  $S_2(\pi_s\pi^*)$ ,  $T_1(\pi\pi^*)$  states are referred as 6SG\_S0, 6SG\_S1, 6SG\_S2, and 6SG\_T1, respectively, and crossing points between  $S_2(\pi\pi^*)$  and  $S_1(n_s\pi^*)$ , between  $T_1(\pi\pi^*)$  and  $S_0$ , between  $S_1(n_s\pi^*)$  and  $S_0$ , and between  $S_1(\pi\pi_{23}^*)$

and  $S_0$  are referred as 6SG\_S2S1, 6SG\_T1S0, 6SG\_S1S0, and 6SG\_S1S0\_23, respectively.

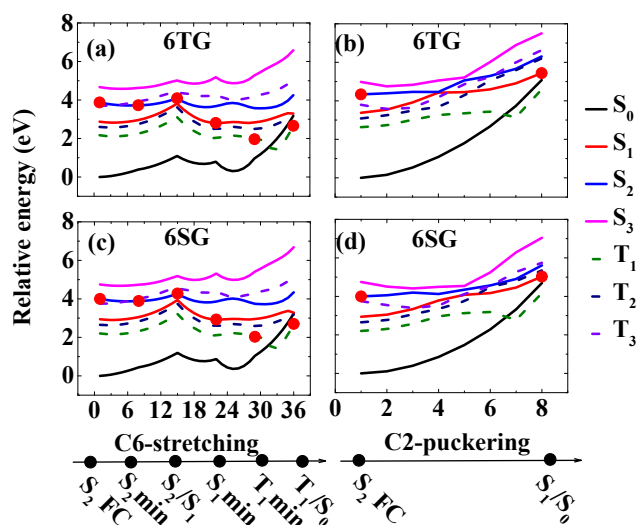

**Figure S3.** LIICs computed at the LR-TD- $\omega$ B97XD/6-31G\* level of theory based on the MS-CASPT2(12,10)/ANO-RCC-VDZP optimized structures.

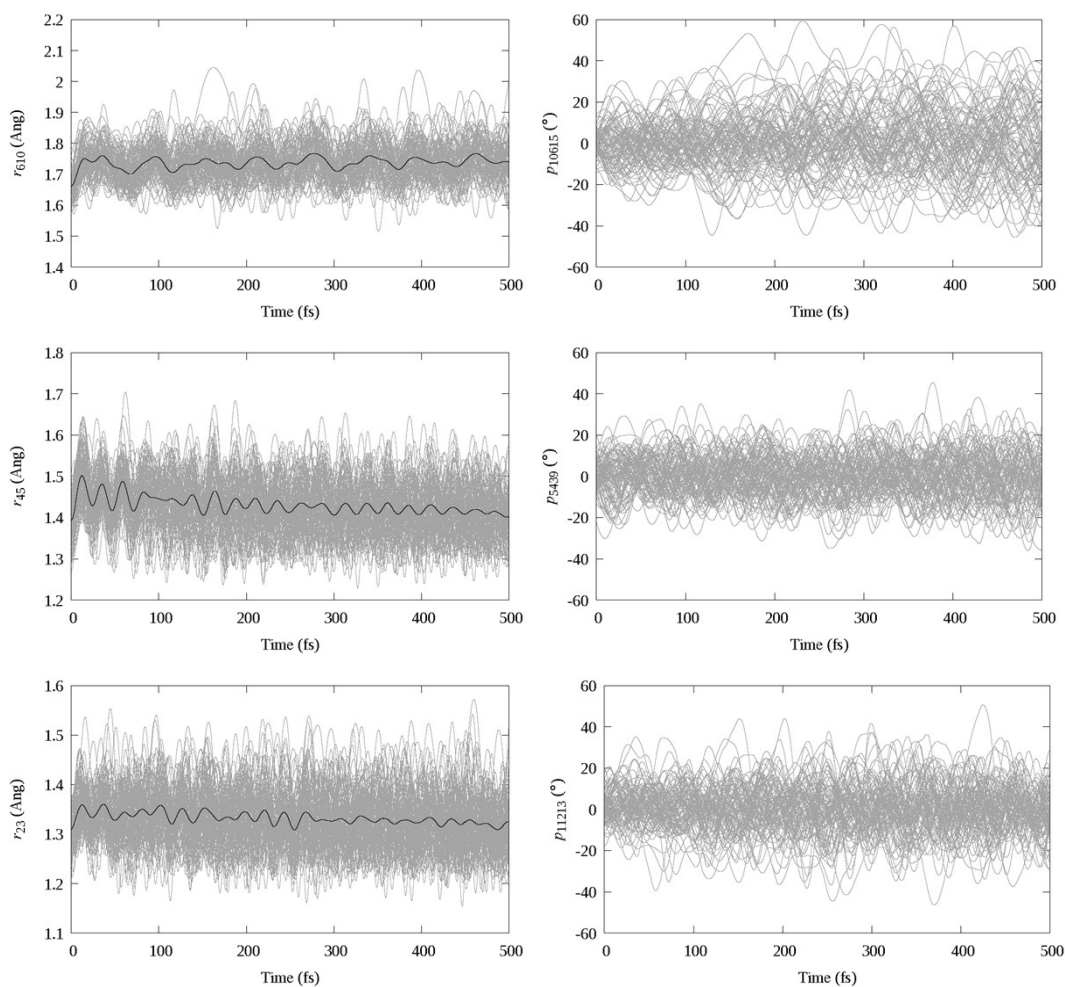

**Figure S4.** Time evolution of some chosen geometrical parameters from dynamics of the  $S_2$  state of 6TG.

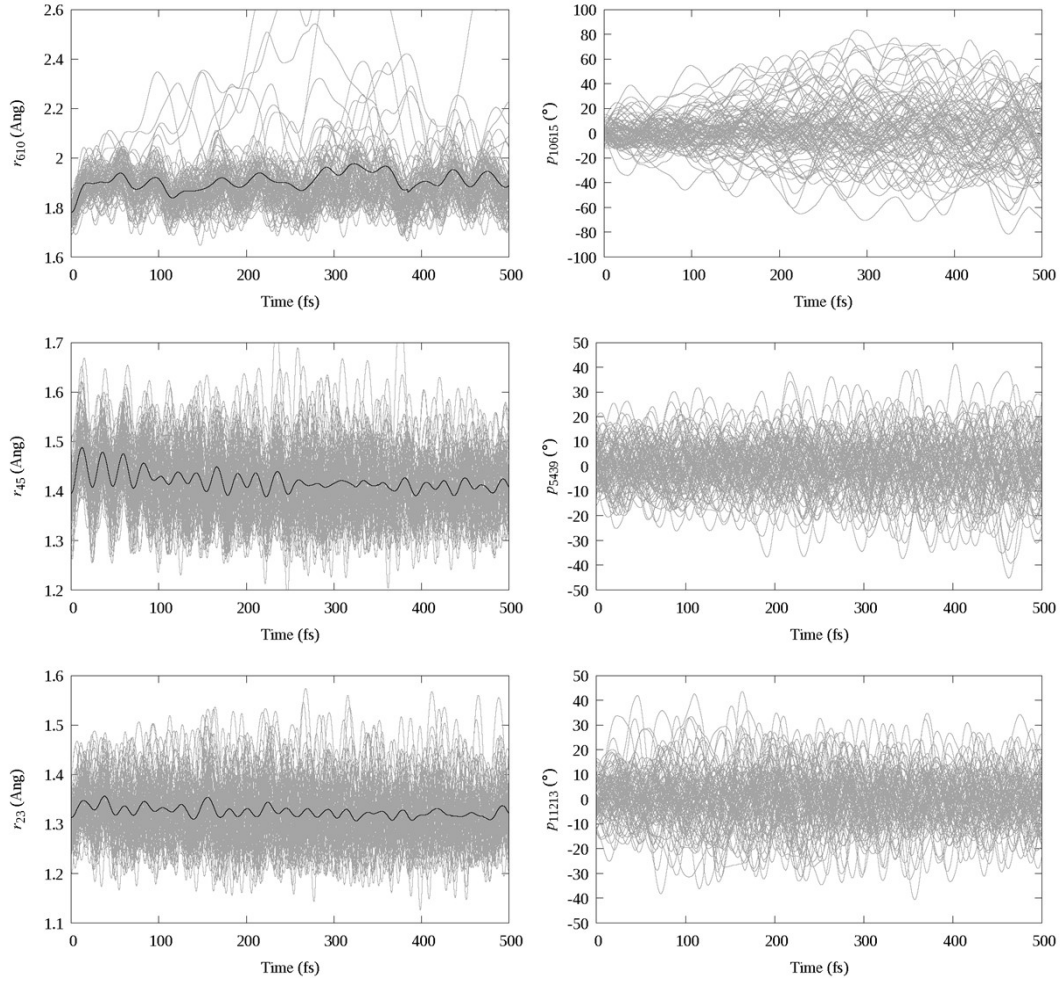

**Figure S5.** Time evolution of some chosen geometrical parameters from dynamics of the  $S_2$  state of 6SG.

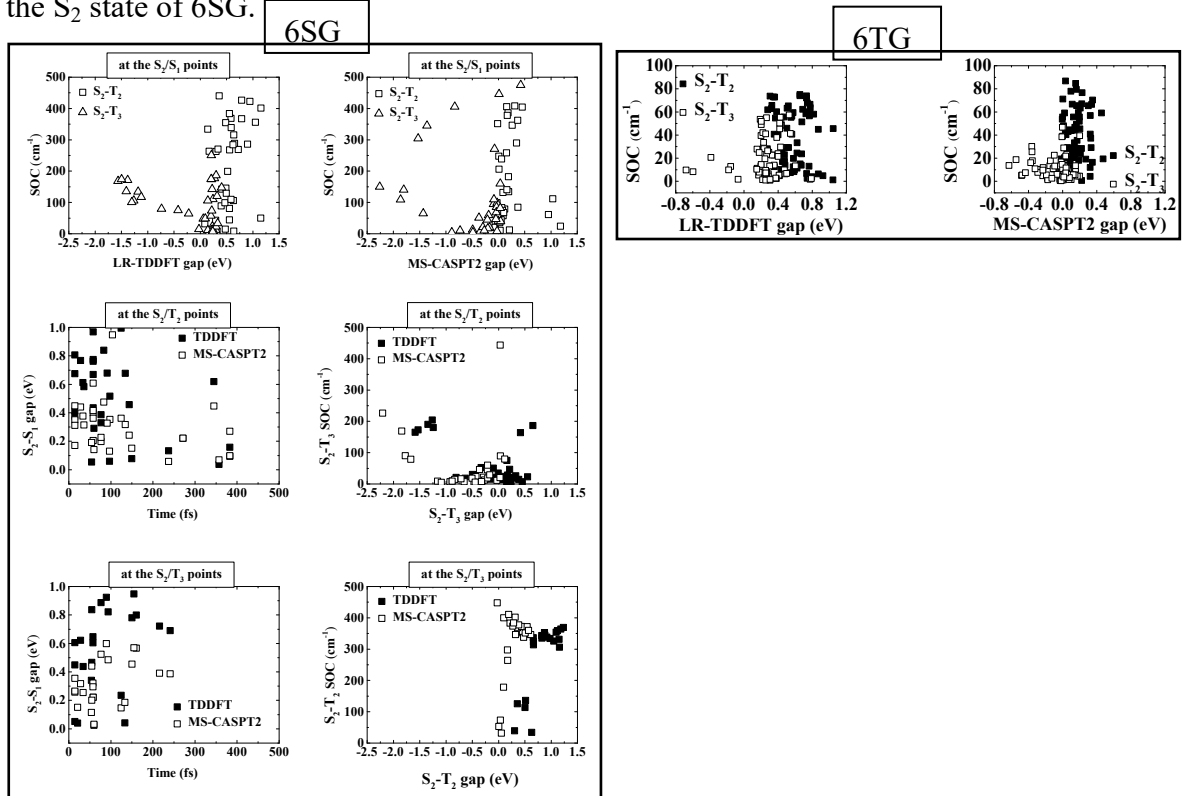

**Figure S6.** Additional calculations of the energy gaps and spin-orbit coupling (SOC) magnitudes at the  $S_2/S_1$ ,  $S_2/T_2$ , and  $S_2/T_3$  crossing points of 6SG, and the energy gaps and spin-orbit coupling magnitudes between  $S_2$  and  $T_2$  and between  $S_2$  and  $T_3$  at the  $S_2/S_1$  hopping points of 6TG.

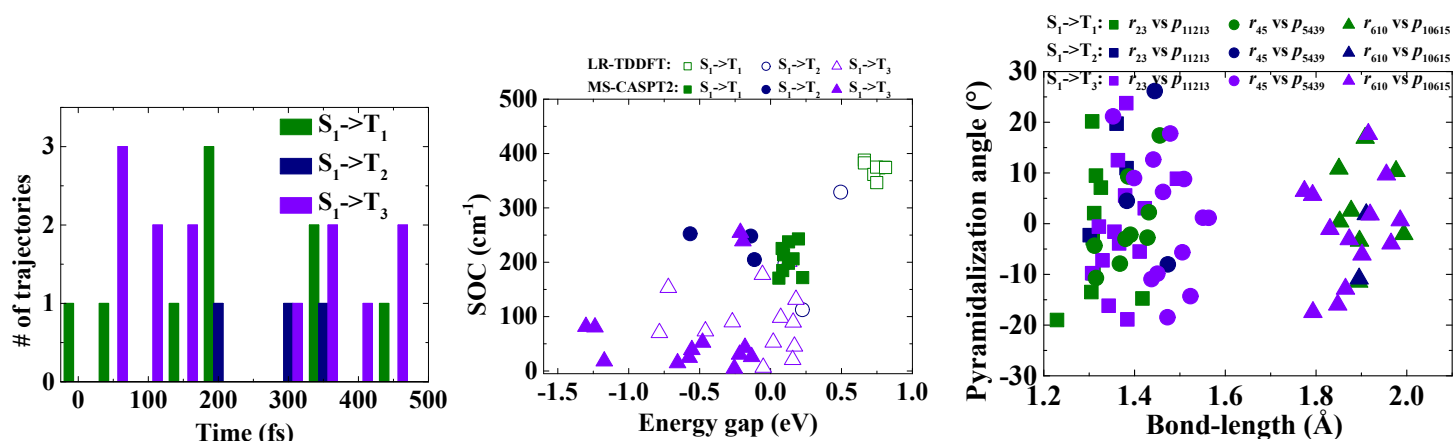

**Figure S7.** Distribution of crossing time, spin-orbit coupling (SOC) vs energy gap, and geometrical parameters for the  $S_1 \rightarrow$  triplet crossings from dynamics of the  $S_2$  state of 6SG.

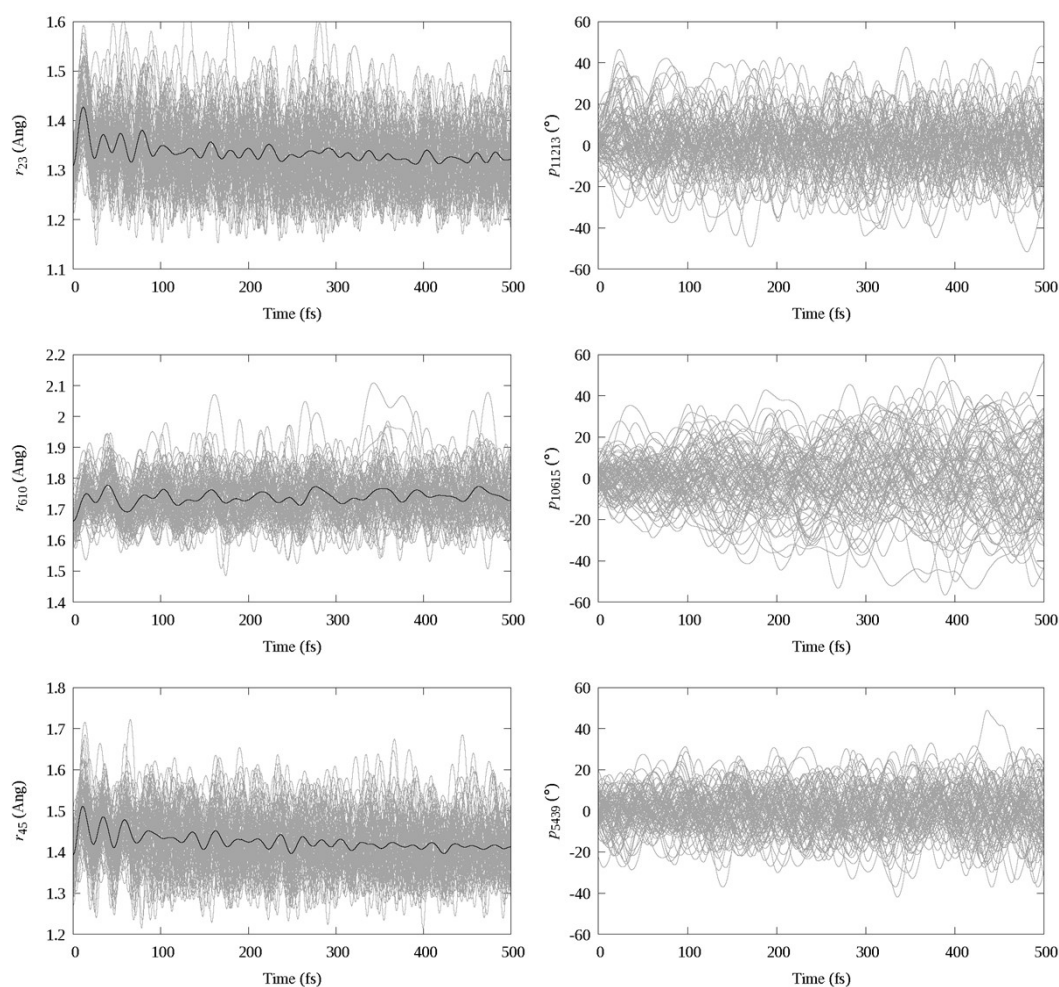

**Figure S8.** Time evolution of some chosen geometrical parameters from dynamics of

the  $S_3$  state of 6TG.

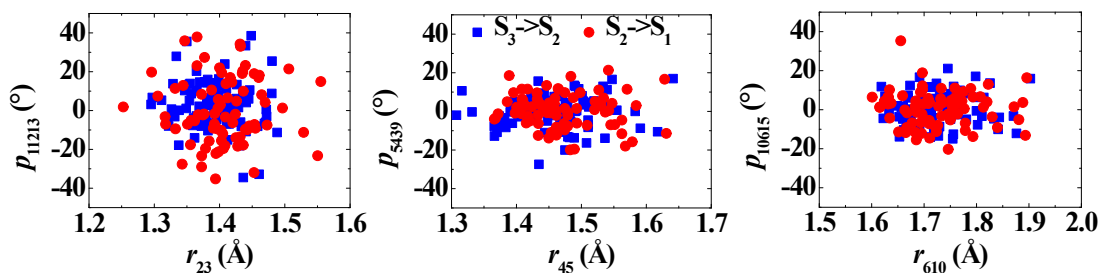

**Figure S9.** Geometrical parameters of hopping points involved in the  $S_3 \rightarrow S_2 \rightarrow S_1$  internal conversion for 6TG.

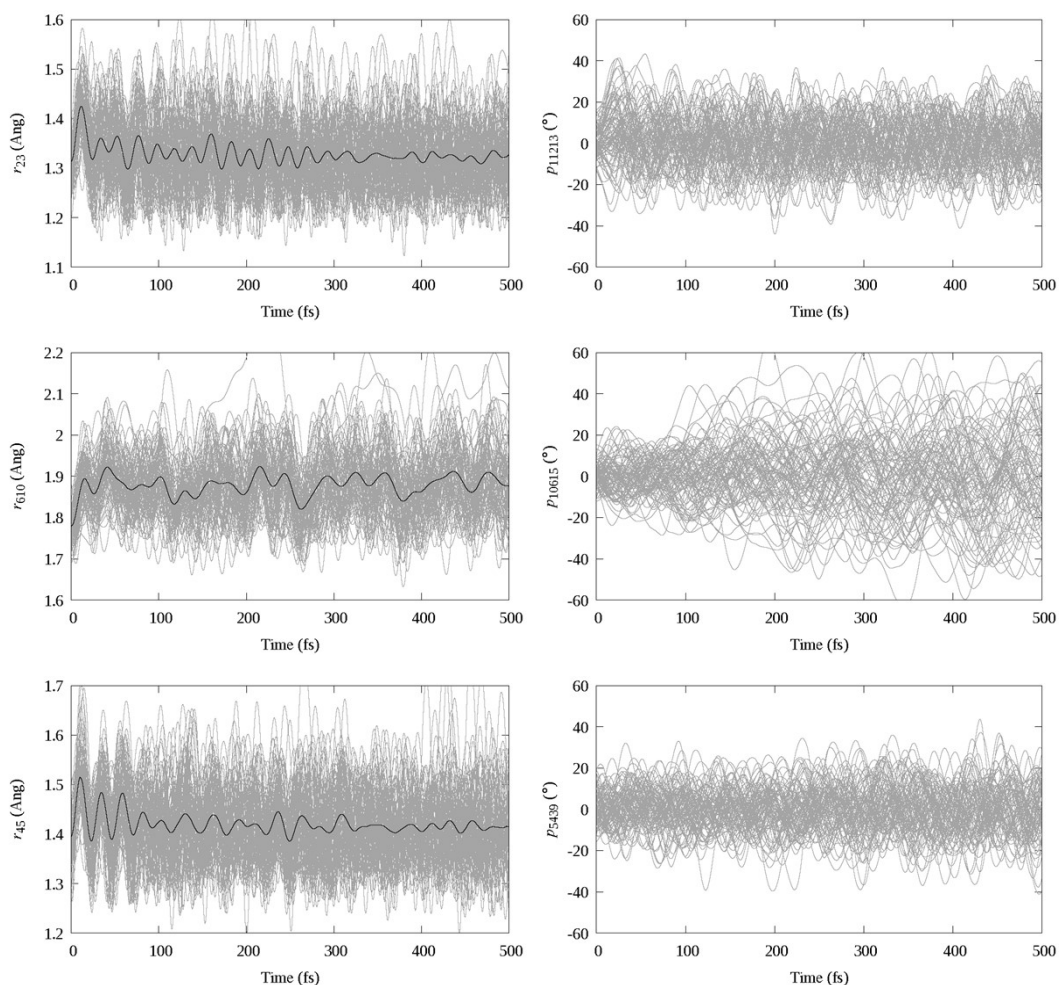

**Figure S10.** Time evolution of some chosen geometrical parameters from dynamics of the  $S_3$  state of 6SG.

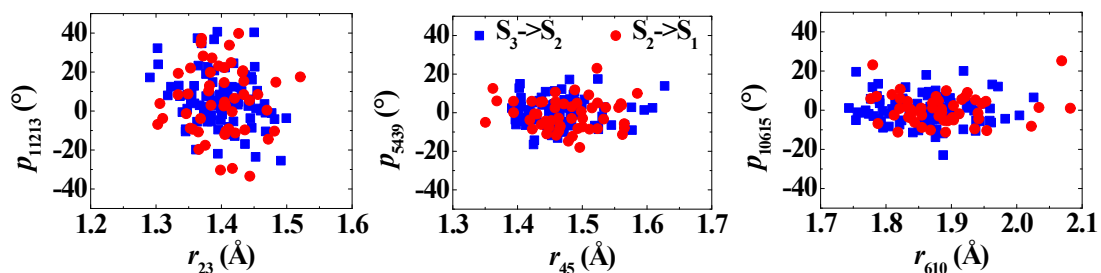

**Figure S11.** Geometrical parameters of hopping points involved in the  $S_3 \rightarrow S_2 \rightarrow S_1$

internal conversion for 6SG.

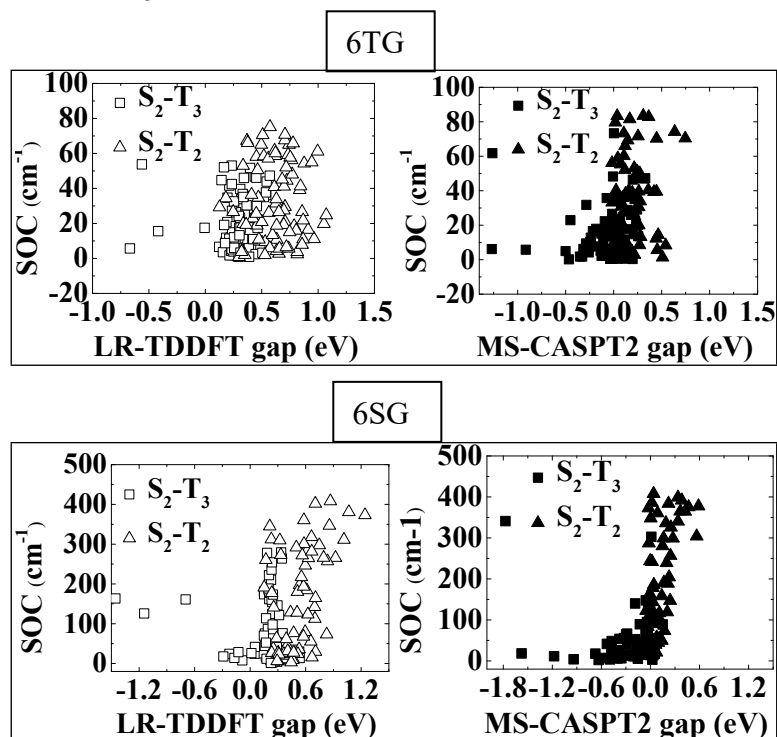

**Figure S12.** Spin-orbit coupling (SOC) vs energy gap for those between  $S_2$  and  $T_2$  and between  $S_2$  and  $T_3$  at the  $S_2 \rightarrow S_1$  and  $S_2 \rightarrow T_{2,3}$  crossing points from dynamics of the  $S_3$  state of both molecules, calculated in different level of theory.

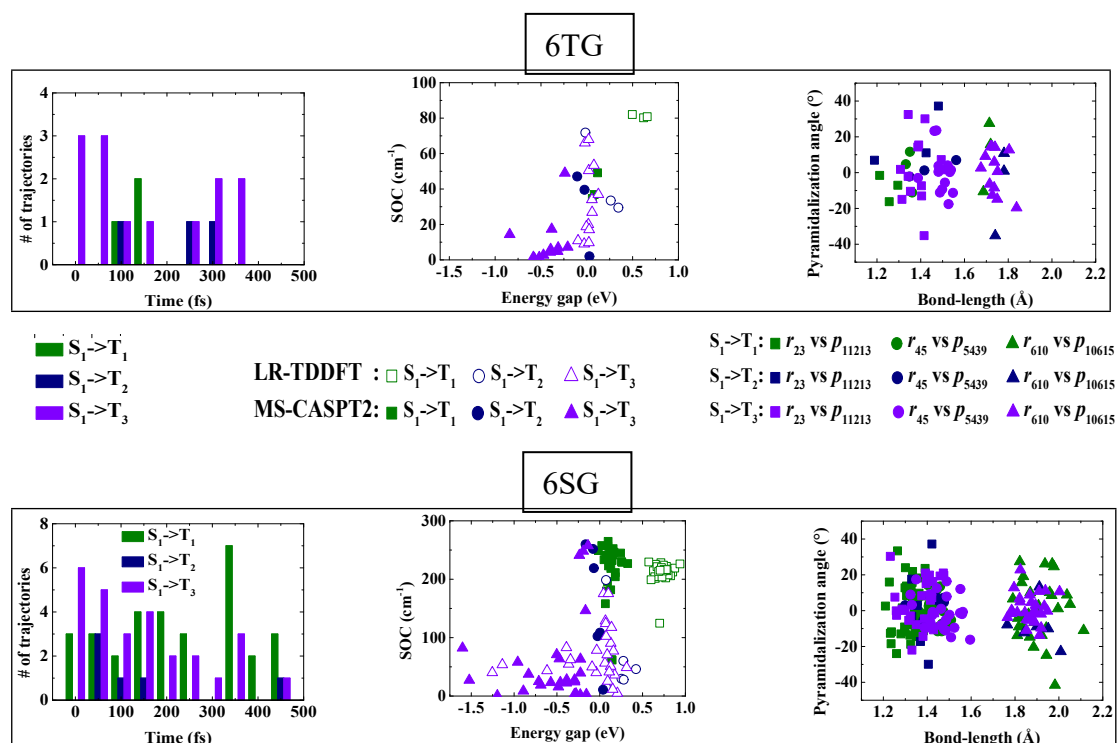

**Figure S13.** Distribution of crossing time, spin-orbit coupling (SOC) vs energy gap, and geometrical parameters for the  $S_1 \rightarrow$  triplet crossings from dynamics of the  $S_3$  state of both molecules.
